# Supplementary material for: Indoxyl Sulfate Contributes to mTORC1-Induced Renal Fibrosis via The OAT/NADPH Oxidase/ROS Pathway
Source: MDPI journal article supplement (doi:10.3390/toxins13120909), 2021-12-18
Supplement: s1 [file s1]

# Supplementary Materials: Indoxyl sulfate contributes to mTORC1-induced renal fibrosis *via* the OAT/NADPH/oxidase/ROS pathway

Takehiro Nakano, Hiroshi Watanabe, Tadashi Imafuku, Kai Tokumaru, Issei Fujita, Nanaka Arimura, Hitoshi Maeda, Motoko Tanaka, Kazutaka Matsushita, Masafumi Fukagawa, and Toru Maruyama

## SUPPLEMENTARY METHODS

### Biochemical evaluation of blood samples

The plasma levels for BUN and creatinine were measured by a FUJI DRI-CHEM 7000 and DRI-CHEM slides system (FUJIFILM, Tokyo, Japan) following the manufacturer's protocol. Red blood cell count and hemoglobin levels were measured using an automatic hematology analyzer (KX-21NV; Sysmex, Kobe, Japan). The values for the biochemical evaluation in plasma from CKD mice are listed in Supplementary Table 1.

### ROS measurements

HK-2 cells were seeded on 96-well plates at  $1.0 \times 10^4$  cell per well. After removing the culture solution, CM-H<sub>2</sub>DCFDA was added and the resulting proportion was allowed to become incorporated into cells by incubating at 37°C for 30 min. After removing the supernatant and adding D-PBS or uremic toxins (1 mM) the fluorescence intensity was measured with a fluorescence plate reader (excitation/emission = 485 nm/535 nm, Spectra Fluor, TECAN).

## SUPPLEMENTARY RESULTS

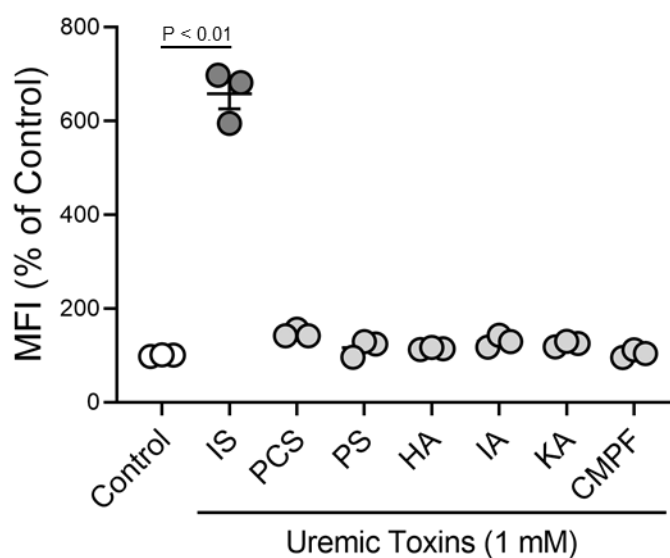

**Figure S1.** Effect of seven uremic toxins on the production of ROS in HK-2 cells. HK-2 cells were starved by incubation in serum-free medium for 2 hours and then treated with CM-H<sub>2</sub>DCFDA in PBS for 30 min. After the removal of the D-PBS, the cells were treated with each uremic toxin (1 mM) and incubated for 90 min.

Fluorescence intensity was measured at an excitation wavelength of 485 nm and at an emission wavelength of 535 nm. Data are expressed as the mean  $\pm$  SEM ( $n = 3$ ).

## SUPPLEMENTARY TABLES

**Table S1.** The list of antibodies for Western blotting (upper table) and primers for quantitative RT-PCR (lower table).

| Primary Antibody               | Company                     | Catalog # | Species | Dilution ratio | Working Solution      |
|--------------------------------|-----------------------------|-----------|---------|----------------|-----------------------|
| p-S6                           | Cell Signaling Technologies | 4858      | Rabbit  | 1:2000         | 1% skim milk in TBS-T |
| S6                             | Cell Signaling Technologies | 2217      | Rabbit  | 1:1000         | 1% skim milk in TBS-T |
| E-cadherin                     | R&D Systems                 | AF648     | Goat    | 1:2000         | 1% skim milk in TBS-T |
| $\alpha$ -SMA                  | Abcam                       | Ab5694    | Rabbit  | 1:2000         | 1% skim milk in TBS-T |
| COL1A1                         | Cell Signaling Technologies | 84336s    | Rabbit  | 1:1000         | 1% skim milk in TBS-T |
| $\beta$ -actin                 | Sigma                       | A5316     | Mouse   | 1:2000         | 1% skim milk in TBS-T |
| Secondary Antibody             | Company                     | Catalog # | Species | Dilution ratio | Working Solution      |
| anti-rabbit IgG-HRP            | Santa Cruz Biotechnology    | sc-2357   | Rabbit  | 1:5000         | 1% skim milk in TBS-T |
| anti-mouse IgG $\kappa$ BP-HRP | Santa Cruz Biotechnology    | sc-516102 | Mouse   | 1:5000         | 1% skim milk in TBS-T |
| anti-goat IgG-HRP              | Santa Cruz Biotechnology    | sc-2768   | Rabbit  | 1:5000         | 1% skim milk in TBS-T |

| Primer Name         | Forward Primer Sequence (5'-3') | Reverse Primer Sequence (5'-3') |
|---------------------|---------------------------------|---------------------------------|
| Human IL-6          | CAGTTCCTGCAGAAAAAGGC            | AACAACAATCTGAGGTGCCC            |
| Human TNF- $\alpha$ | TGAAAGCATGATCCGGGACG            | CAGCTTGAGGGTTTGCTACAAC          |
| Human GAPDH         | GGTGAAGGTCGGAGTCAACG            | ACCATGTAGTTGAGGTCAATGAAGG       |
| Mouse IL-6          | TCTCTGCAAGAGACTTCCATCC          | AGACAGGTCTGTTGGGAGTG            |
| Mouse TNF- $\alpha$ | CATGAGCACAGAAAGCATGATCCG        | AAGCAGGAATGAGAAGAGGCTGAG        |
| Mouse GAPDH         | AAC TTTGGCATTGTGGAAGG           | ACACATTGGGGGTAGGAACA            |

**Table S2.** Plasma biochemical parameters in CKD mice. BUN, SCr, RBC, and Hb for control mice and 0.2% adenine-containing diet (CKD) feeding mice without/with AST-120 or rapamycin treatments.

|                            | Control     | CKD                      | CKD<br>+ AST-120         | CKD<br>+ Rapamycin       |
|----------------------------|-------------|--------------------------|--------------------------|--------------------------|
| BUN (mg/dL)                | 27.8 ± 2.8  | 40.6 ± 4.3 <sup>a</sup>  | 36.9 ± 1.9 <sup>a</sup>  | 36.9 ± 2.1 <sup>a</sup>  |
| SCr (mg/dL)                | 0.18 ± 0.04 | 0.29 ± 0.04 <sup>a</sup> | 0.26 ± 0.05 <sup>a</sup> | 0.26 ± 0.06 <sup>a</sup> |
| RBC (×10 <sup>4</sup> /μL) | 746 ± 16    | 613 ± 8 <sup>a</sup>     | 700 ± 9 <sup>b</sup>     | 695 ± 21 <sup>b</sup>    |
| Hb (g/dL)                  | 12.0 ± 0.1  | 9.7 ± 0.2 <sup>a</sup>   | 11.1 ± 0.4 <sup>b</sup>  | 11.1 ± 0.5 <sup>b</sup>  |

Data are expressed as the mean ± SE (*n* = 5).

<sup>a</sup> *p* < 0.05 compared with Control.

<sup>b</sup> *p* < 0.05 compared with CKD.

BUN, blood urea nitrogen; SCr, serum creatinine; RBC, red blood cell; Hb, hemoglobin
